# Supplementary material for: Extrusion Based 3D Printing of Sustainable Biocomposites from Biocarbon and Poly(trimethylene terephthalate)
Source: MDPI journal article supplement (doi:10.3390/molecules26144164), 2021-07-08
Supplement: s1 [file s1]

## Supplementary

Table S1 – Mechanical properties of injection moulded composites.

| Composite | Tensile Strength (MPa) | Tensile Modulus (GPa) | Flexural Strength (MPa) | Flexural Modulus (GPa) | Impact Strength (J/m) |
|-----------|------------------------|-----------------------|-------------------------|------------------------|-----------------------|
| 100/0     | 55.7 ± 0.36            | 2.313 ± 0.071         | 84.95 ± 0.46            | 2.293 ± 0.007          | 97.65 ± 4.07          |
| 97.5/2.5  | 59.5 ± 1.32            | 2.249 ± 0.025         | 88.93 ± 1.03            | 2.417 ± 0.041          | 69.60 ± 5.23          |
| 95/5      | 57.7 ± 0.41            | 2.453 ± 0.096         | 86.83 ± 0.67            | 2.409 ± 0.011          | 58.30 ± 7.33          |
| 92.5/7.5  | 58.7 ± 0.70            | 2.325 ± 0.045         | 88.24 ± 0.68            | 2.491 ± 0.022          | 51.78 ± 3.09          |
| 90/10     | 57.7 ± 0.87            | 2.547 ± 0.045         | 88.62 ± 0.90            | 2.536 ± 0.026          | 57.78 ± 5.92          |
